# Supplementary material
Source: publisher site journal article supplement (https://www.dovepress.com/article/303559)
Supplement: Supplementary file 1 [file get_supplementary_file.php]

**Figure S1** Improvements in lines of vision.
